# Supplementary material for: Evaluation of methods for the reduction of contaminating host reads when performing shotgun metagenomic sequencing of the milk microbiome
Source: PubMed Central journal article supplement (PMC7728742; doi:10.1038/s41598-020-78773-6), 2020-12-10
Supplement: 41598_2020_78773_MOESM1_ESM.pdf [file 41598_2020_78773_MOESM1_ESM.pdf]

# **Evaluation of methods for the reduction of contaminating host reads when performing shotgun metagenomic sequencing of the milk microbiome**

Min Yap<sup>1,2^</sup>, Conor Feehily<sup>1,3^</sup>, Calum J. Walsh<sup>1,3</sup>, Mark Fenelon<sup>1</sup>, Eileen F. Murphy<sup>4</sup>, Fionnuala M. McAuliffe<sup>3,5</sup>, Douwe van Sinderen<sup>2,3</sup>, Paul W O'Toole<sup>2,3</sup>, Orla O'Sullivan<sup>1,3</sup>, Paul D. Cotter<sup>1,3\*</sup>

<sup>1</sup>Teagasc Food Research Centre, Moorepark, Fermoy, Co. Cork, Ireland

<sup>2</sup>School of Microbiology, University College Cork, Ireland

<sup>3</sup>APC Microbiome Ireland, Cork, Ireland

<sup>4</sup>Precision Biotics, Cork, Ireland

<sup>5</sup>UCD Perinatal Research Centre, School of Medicine, University College Dublin, National Maternity Hospital, Dublin, Ireland.

<sup>^</sup> Both authors contributed equally to this study

\* Correspondence to [Paul.Cotter@teagasc.ie](mailto:Paul.Cotter@teagasc.ie)

## Supplementary Information

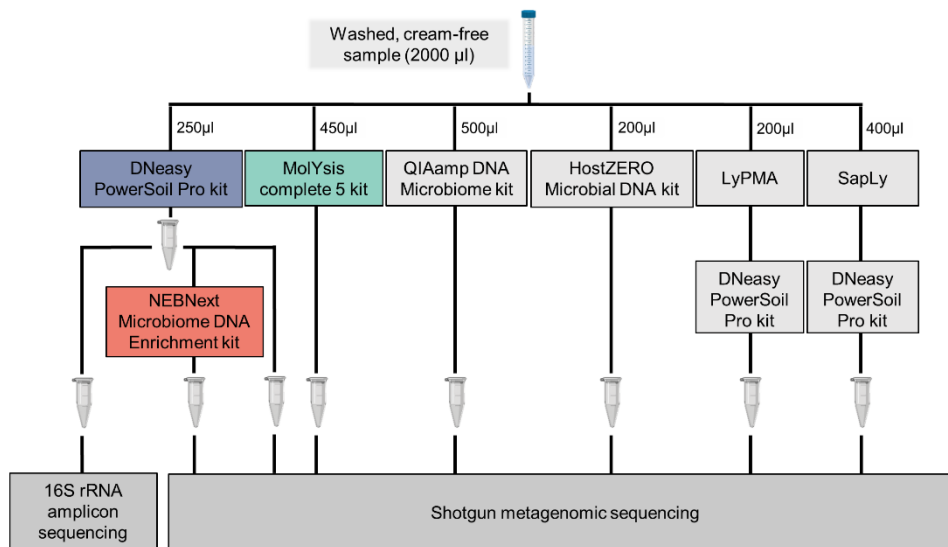

**Supplementary Figure S1.** Initial extraction plan. Two millilitres of the cream-free milk sample were to be divided into varying volumes depending on sample volume input recommended by the different kits and methods. The QIAamp DNA Microbiome kit and HostZERO Microbial DNA kit were both available commercially (Qiagen and Zymo Research). Both kits selectively lyse host cells prior to extraction of DNA from bacterial cells. Host depletion and subsequent DNA extractions were done according to the manufacturer's instructions for both kits. The LyPMA method, according to Marotz et al. (2018), involves osmotic lysis of host cells followed by PMA treatment to remove non-microbial cells in the sample. The SapLy method, according to Charalampous et al. (2019), uses a detergent to lyse host cells followed by enzymatic removal before further extraction of DNA from microbial cells. Further evaluation of the methods in grey were discontinued due to the limited starting sample volumes. This figure was created in part with [BioRender.com](https://www.biorender.com).

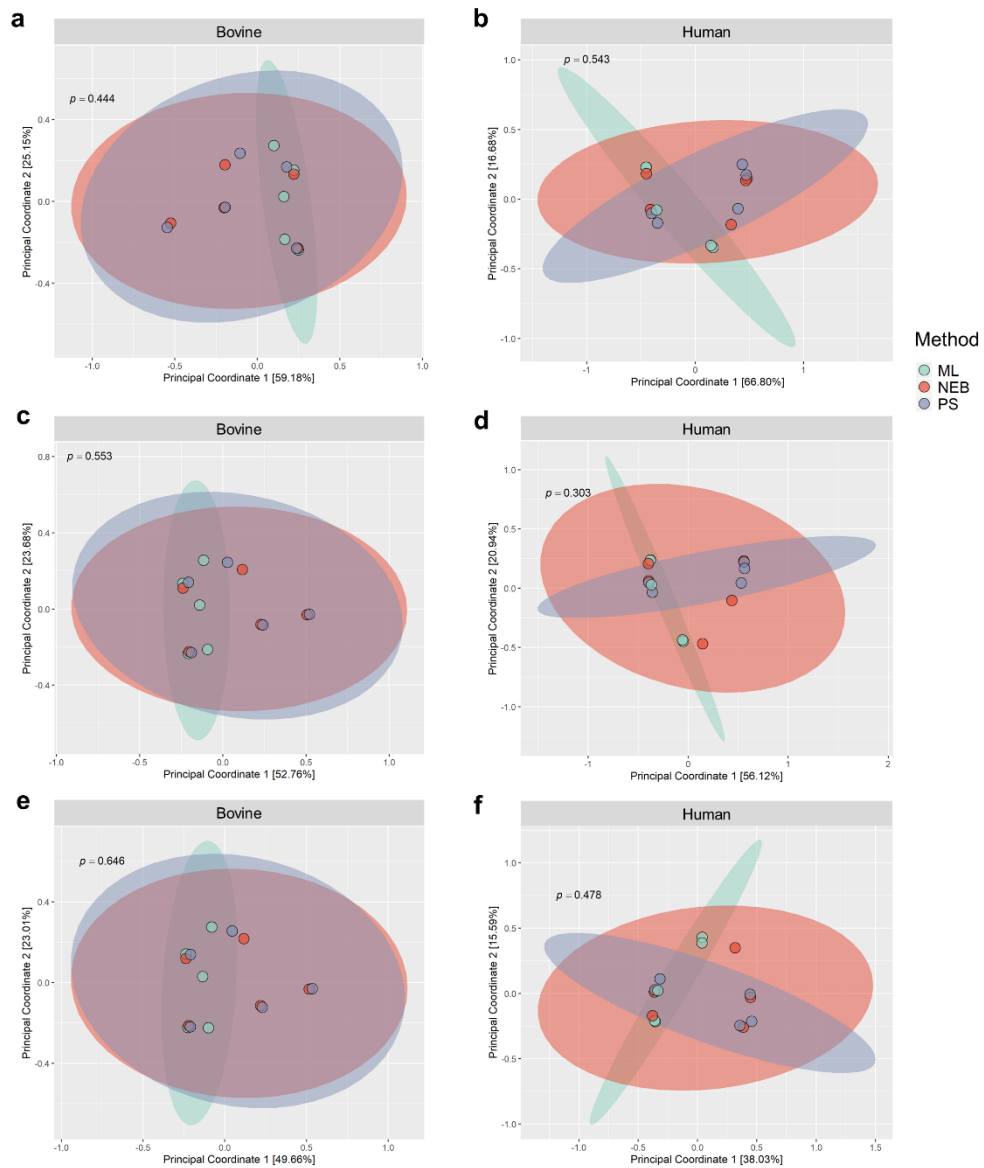

**Supplementary Figure S2.** Functional analysis of bovine and human milk samples as based on gene ontology domains. **(a)** Gene families related to cellular components for bovine and **(b)** human milk samples. **(c)** Gene families related to biological processes for bovine and **(d)** human milk samples. **(e)** Gene families related to molecular function for bovine and **(f)** human milk samples. Figures were produced using R<sup>48</sup>.

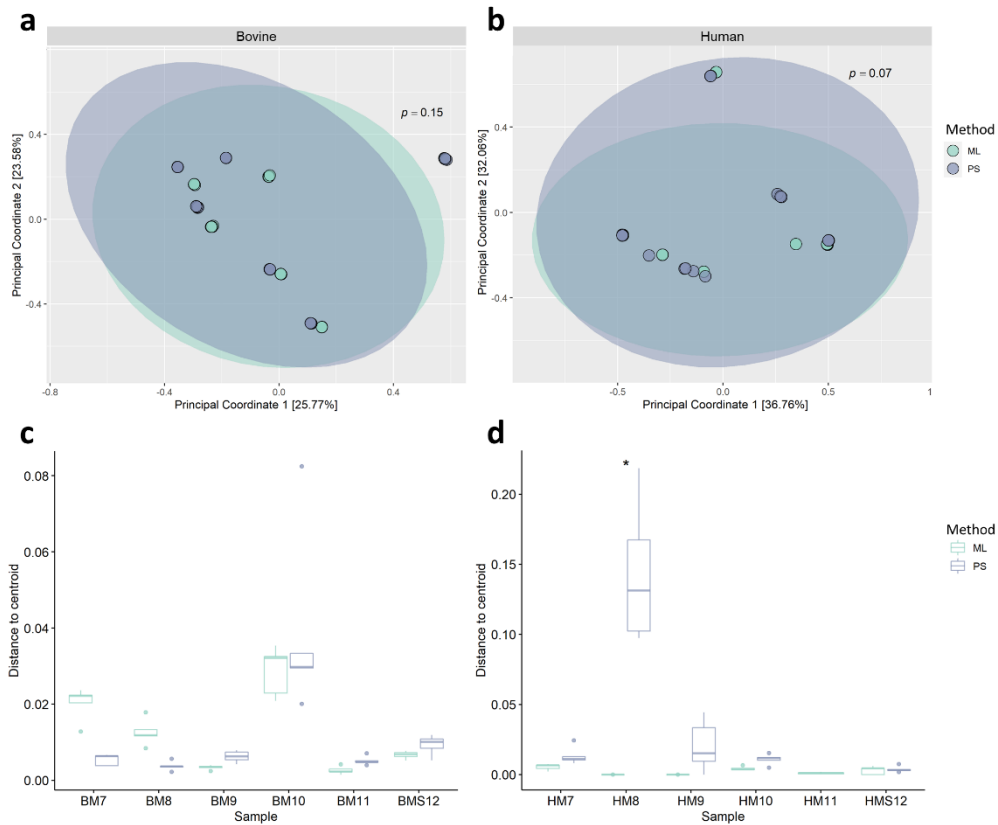

**Supplementary Figure S3.** Community composition and within-sample differences for samples subsampled to 50,000 non-host reads. Bray-Curtis dissimilarity plots for microbial communities from ML and PS kits were determined for (a) bovine and (b) human milk samples. Statistical community dissimilarities were calculated using ADONIS. The distances of samples to their respective centroids for each kit for (c) bovine and (d) human samples. Statistical differences were calculated using One-way ANOVA with post-hoc Tukey HSD test, with significant differences of a  $p$  value  $< 0.05$  denoted with an asterisk. Figures were produced using R<sup>48</sup>.

**Supplementary Table S1.** Summary of sequencing quality control data for each sample.

| <b>Sample</b> | <b>DNA yield<br/>(ng/μl)</b> | <b>Total number of<br/>raw reads</b> | <b>Total number of quality-<br/>filtered reads</b> | <b>Total number of<br/>non-host reads</b> |
|---------------|------------------------------|--------------------------------------|----------------------------------------------------|-------------------------------------------|
| BM7_ML        | 1.22                         | 4,803,678                            | 4,799,422                                          | 414,123                                   |
| BM8_ML        | 2.02                         | 4,218,166                            | 4,213,627                                          | 521,433                                   |
| BM9_ML        | 0.418                        | 5,831,258                            | 5,826,847                                          | 5,108,499                                 |
| BM10_ML       | 0.764                        | 5,503,695                            | 5,489,219                                          | 1,559,305                                 |
| BM11_ML       | 1.87                         | 3,752,539                            | 3,749,575                                          | 2,597,792                                 |
| BMS12_ML      | 12                           | 3,961,530                            | 3,956,586                                          | 2,714,533                                 |
| HM7_ML        | 0.134                        | 4,577,558                            | 4,572,083                                          | 801,292                                   |
| HM8_ML        | 0.304                        | 367,496                              | 366,997                                            | 13,288                                    |
| HM9_ML        | < 0.001                      | 899,823                              | 898,330                                            | 22,347                                    |
| HM10_ML       | 0.155                        | 14,301,289                           | 14,289,863                                         | 9,427,921                                 |
| HM11_ML       | < 0.001                      | 2,558,808                            | 2,555,194                                          | 51,285                                    |
| HMS12_ML      | 4.01                         | 3,135,085                            | 3,128,637                                          | 2,913,481                                 |
| PBS_ML        | < 0.001                      | 8,145                                | 8,136                                              | 8,136                                     |
| BM7_NEB       | 3.74                         | 4,634,478                            | 4,630,852                                          | 47,889                                    |
| BM8_NEB       | 0.389                        | 4,623,058                            | 4,619,434                                          | 61,189                                    |
| BM9_NEB       | 2.92                         | 5,145,897                            | 5,142,366                                          | 2,141,081                                 |
| BM10_NEB      | 2.43                         | 4,384,900                            | 4,378,312                                          | 114,853                                   |
| BM11_NEB      | 0.468                        | 5,620,335                            | 5,616,578                                          | 2,050,519                                 |
| BMS12_NEB     | 2.4                          | 2,990,318                            | 2,987,713                                          | 588,814                                   |
| HM7_NEB       | 2.17                         | 3,714,043                            | 3,711,382                                          | 118,695                                   |
| HM8_NEB       | 2.86                         | 3,505,245                            | 3,502,584                                          | 76,561                                    |
| HM9_NEB       | < 0.001                      | 7,449,515                            | 7,444,889                                          | 137,544                                   |
| HM10_NEB      | 1.54                         | 4,046,734                            | 4,043,758                                          | 166,690                                   |
| HM11_NEB      | < 0.001                      | 4,773,599                            | 4,770,318                                          | 124,328                                   |
| HMS12_NEB     | 1.73                         | 3,251,920                            | 3,248,935                                          | 1,059,091                                 |
| PBS_NEB       | < 0.001                      | 4,804                                | 4,791                                              | 4,791                                     |
| BM7_PS        | 16.6                         | 4,306,883                            | 4,298,577                                          | 53,485                                    |
| BM8_PS        | 1.4                          | 4,466,519                            | 4,462,271                                          | 54,412                                    |
| BM9_PS        | 12.2                         | 949,504                              | 948,705                                            | 174,822                                   |
| BM10_PS       | 5.32                         | 5,057,336                            | 5,045,050                                          | 140,571                                   |
| BM11_PS       | 1.93                         | 4,039,654                            | 4,036,626                                          | 511,785                                   |
| BMS12_PS      | 5.83                         | 3,734,020                            | 3,730,408                                          | 712,548                                   |
| HM7_PS        | 4.49                         | 4,779,699                            | 4,775,683                                          | 166,226                                   |
| HM8_PS        | 5.45                         | 3,434,585                            | 3,431,627                                          | 97,069                                    |
| HM9_PS        | 0.409                        | 4,432,677                            | 4,429,588                                          | 132,241                                   |

---

|          |         |           |           |           |
|----------|---------|-----------|-----------|-----------|
| HM10_PS  | 4.08    | 4,606,083 | 4,598,639 | 201,712   |
| HM11_PS  | 0.207   | 3,626,184 | 3,623,049 | 111,156   |
| HMS12_PS | 4.03    | 3,604,484 | 3,600,859 | 1,090,248 |
| PBS_PS   | < 0.001 | 659       | 654       | 654       |

---

**Supplementary Table S2.** List of species (> 1% relative abundance) assigned to negative control samples by each classifier

| Classifier | PBS_ML                                  | PBS_NEB                                        | PBS_PS                             |
|------------|-----------------------------------------|------------------------------------------------|------------------------------------|
| MetaPhlAn2 | <i>Lactobacillus crispatus</i>          | No species assigned                            | No species assigned                |
|            | <i>Aerococcus viridans</i>              |                                                |                                    |
| Kraken2    | <i>Aerococcus viridans</i>              | <i>Cutibacterium acnes</i>                     | <i>Pseudomonas alcaliphila</i>     |
|            | <i>Cutibacterium acnes</i>              | <i>Propionibacterium</i> sp.<br>oral taxon 193 | <i>Negativicoccus massiliensis</i> |
|            | <i>Lactobacillus amylovorus</i>         | <i>Pseudomonas pseudoalcaligenes</i>           |                                    |
|            | <i>Actinoalloteichus</i> sp. AHMU CJ021 | <i>Micrococcus luteus</i>                      |                                    |
|            | <i>Klebsiella pneumoniae</i>            |                                                |                                    |
|            | <i>Lactobacillus johnsonii</i>          |                                                |                                    |
|            | <i>Aerococcus urinaeequi</i>            |                                                |                                    |
|            | <i>Negativicoccus massiliensis</i>      |                                                |                                    |
|            | <i>Escherichia coli</i>                 |                                                |                                    |
|            | <i>Enterococcus faecalis</i>            |                                                |                                    |
|            | <i>Rhodobacter sphaeroides</i>          |                                                |                                    |
|            | <i>Acinetobacter johnsonii</i>          |                                                |                                    |
|            | <i>Moraxella osloensis</i>              |                                                |                                    |
| Kaiju      | <i>Staphylococcus aureus</i>            | <i>Staphylococcus aureus</i>                   | <i>Ralstonia solanacearum</i>      |
|            | <i>Aerococcus viridans</i>              |                                                | <i>Pseudomonas</i> sp. 286         |
|            | <i>Lactobacillus crispatus</i>          |                                                | <i>Acinetobacter nosocomialis</i>  |
|            | <i>Escherichia coli</i>                 |                                                | <i>Enterobacter cloacae</i>        |
|            |                                         |                                                | <i>Clostridioides difficile</i>    |
|            |                                         |                                                | <i>Acinetobacter johnsonii</i>     |
